# Supplementary material for: Specifically modified Env immunogens activate B-cell precursors of broadly neutralizing HIV-1 antibodies in transgenic mice
Source: PubMed Central journal article supplement (PMC4770077; doi:10.1038/ncomms10618), 2016-02-24
Supplement: ncomms10618-s1.pdf [file ncomms10618-s1.pdf]

|            | CDRL1                                                                                                       | CDRL2 | CDRL3 |
|------------|-------------------------------------------------------------------------------------------------------------|-------|-------|
| g1VRC/NIH  | EIVLTQSPATLSLSPGERATLSCR---ASQSVSSYLAWYQQKPGQAPRLLIYDASNRATGIPARFSGSGSGTDFTLTISSELEPEDFAVYYCQQYEFFGQGTKLEIK |       |       |
| g112A21    | DIQMTQSPSSLSASVGDRTITCQ---ASQDISNYLNWYQQKPGKAPKLLIYDASNLETGVPSRFRSGSGSGTDFTFTISSLPEDIATYYCAVLEFFPGTKVDIK    |       |       |
| g13BNC60   | DIQMTQSPSSLSASVGDRTITCQ---ASQDISNYLNWYQQKPGKAPKLLIYDASNLETGVPSRFRSGSGSGTDFTFTISSLPEDIATYYCQQYEFIPGTKVDIK    |       |       |
| g1VRC-CH31 | DIQMTQSPSSLSASVGDRTITCQ---ASQDISNYLNWYQQKPGKAPKLLIYDASNLETGVPSRFRSGSGSGTDFTFTISSLPEDIATYYCQQYEFFGQGTKLEIK   |       |       |
| g1PGV04    | EIVLTQSPGTLSPGERATLSCR---ASQSVSSSYLAWYQQKPGQAPRLLIYGASSRATGIPDRFSGSGSGTDFTLTISRLEPEDFAVYYCQQLEFFGQGTRLEIK   |       |       |
| g1PGV19/20 | -QSALTQPAVSGSPGQSITISCTGTSSDVGGINYSWYQQHPGKAPKLLMIYEVSNRPSGVSNRFRSGSKSGNTASLTISGLQAEEADYYCSSYEFFGGGTRVFVL   |       |       |

**Supplementary Figure 1. Amino acid alignment of the light chain variable regions of germline VRC01-class antibodies.** Gray areas indicate (Kabat) CDRL regions. Blue letters indicate negatively charged amino acids and red letters indicate positively charged amino acids.

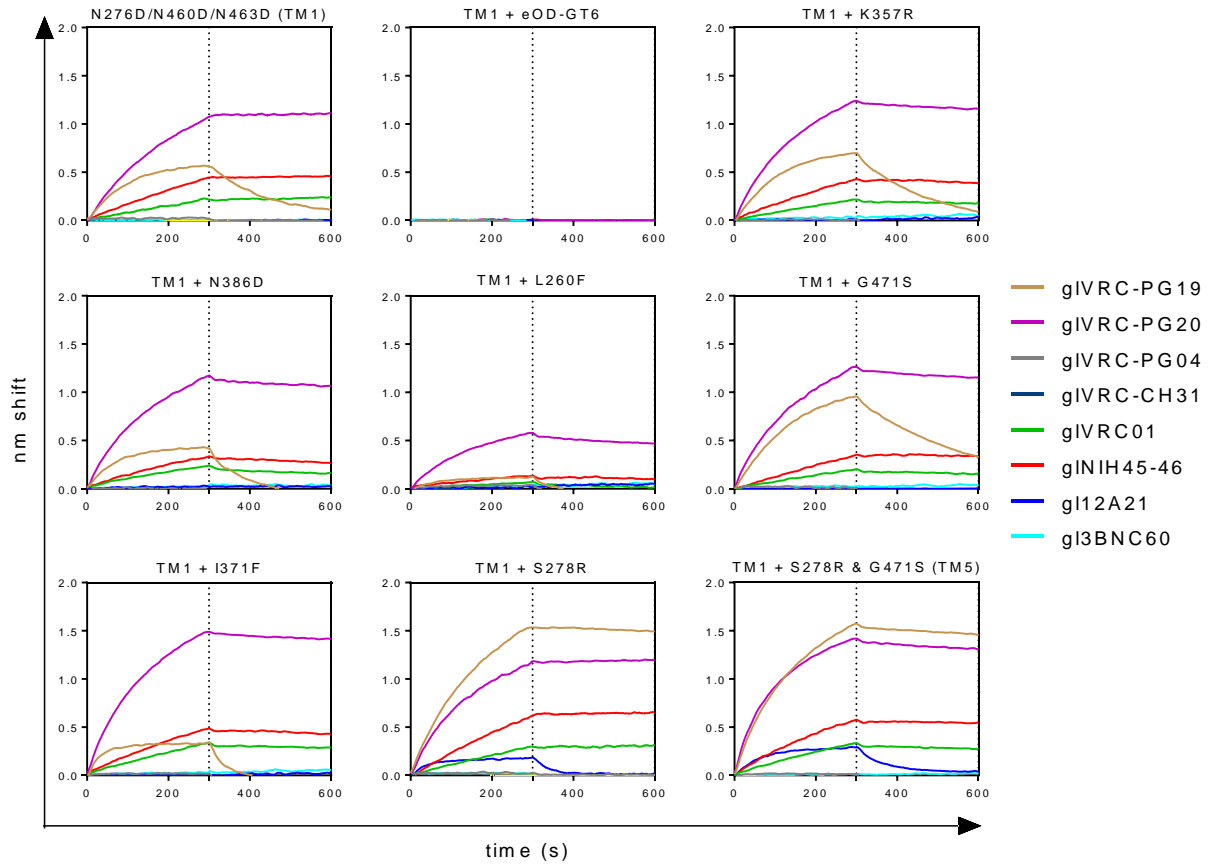

**Supplementary Figure 2. Binding of gIVRC01-class antibodies to 426c Env with mutations previously identified as improving antibody-recognition of the outer domain of gp120, eOD-GT6.** The interaction of the indicated gI antibodies to gp120 variants of 426cTM1 with six additional mutations identified to improve gIVRC01-class antibodies to eOD-GT6<sup>12</sup> were determined by BLI. BLI traces are representative of at least 3 independent replicates.

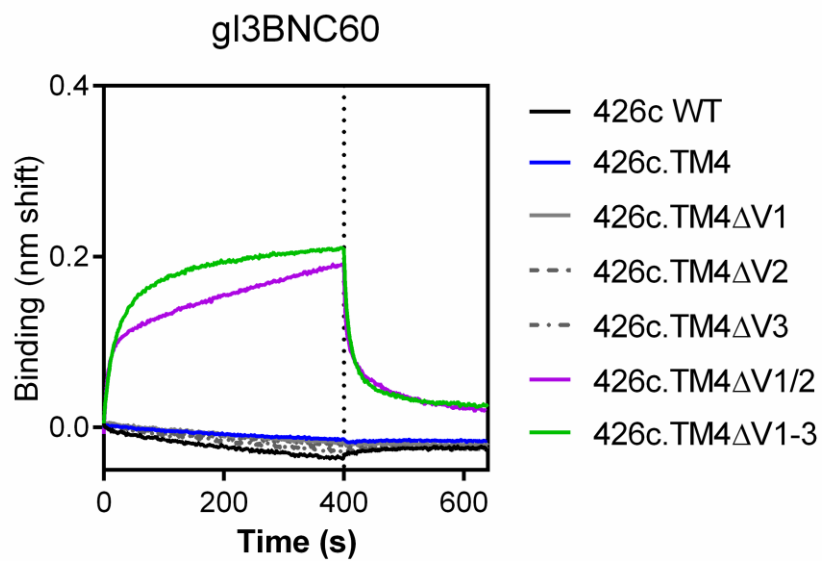

**Supplementary Figure 3. Effect of Env variable loop deletions on the binding of gl3BNC60.** Binding of gl3BNC60 to 426cTM4 gp120, or to 426cTM4 gp120 with the variable regions 1, 2 and 3 deleted individually (426cTM4 $\Delta$ V1, 426cTM4 $\Delta$ V2 and 426cTM4 $\Delta$ V3, respectively), or in combination (426cTM4 $\Delta$ V1/2 and 426cTM4 $\Delta$ V1-3). BLI traces are representative of 2 independent replicates.

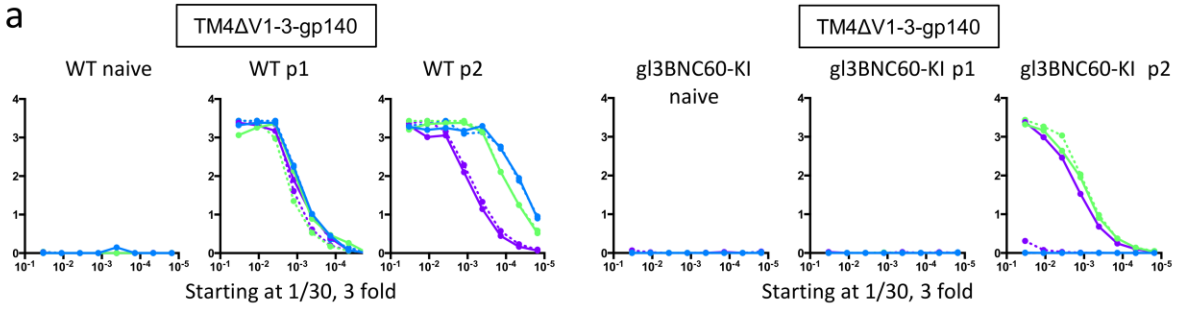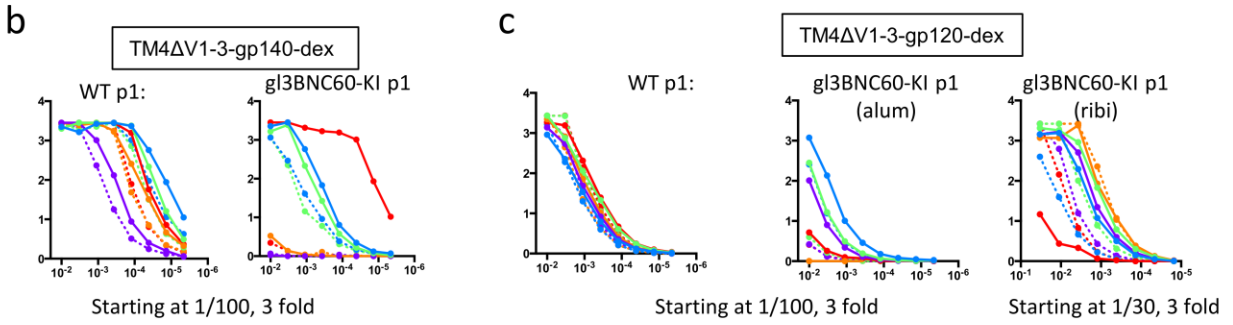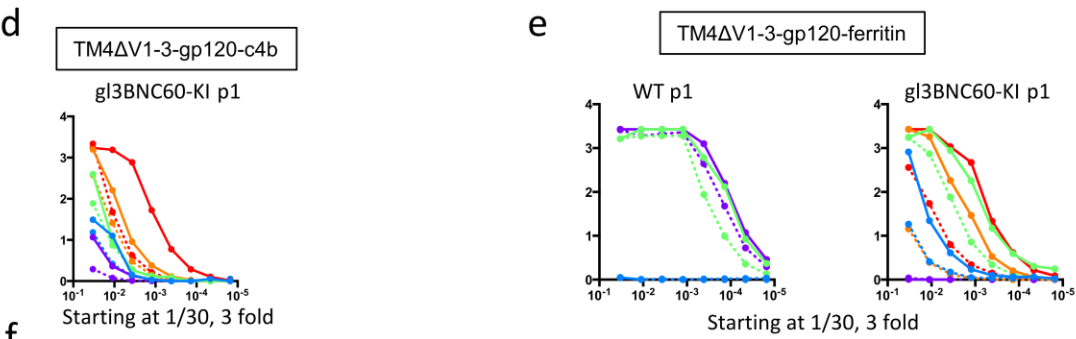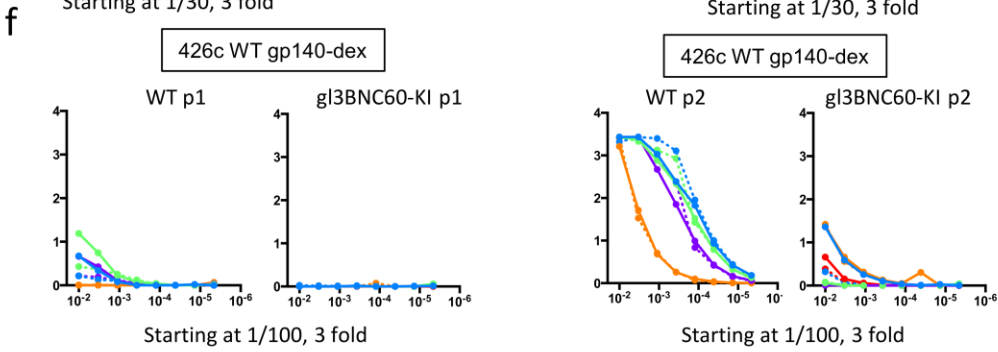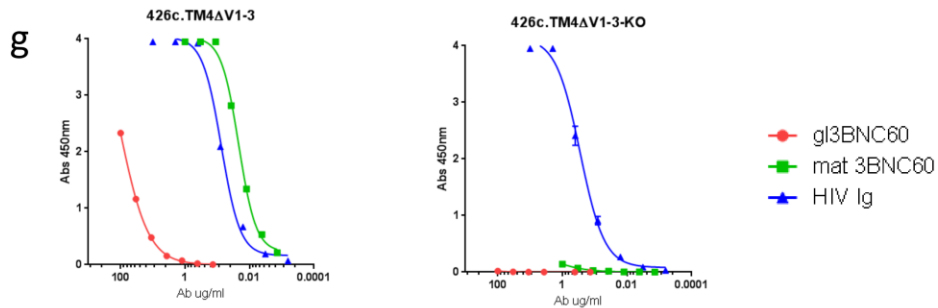

**Supplementary Figure 4. Antibody responses elicited in WT and knock-in gl3BNC60 mice after immunization.**

(a) Serum IgG collected prior to (naïve) and following one or two immunizations (post 1, 2) with 426cTM4ΔV1-V3 gp140 in Alum Imject were tested for binding to 426cTM4ΔV1-V3 gp140 (solid lines) or 426cTM4ΔV1-V3.gp140.D368R.E370A protein (KO) (dotted lines) in WT (left three panels, n=3) and knock-in gl3BNC60 mice (right three panels, n=3) by ELISA. Colors indicate individual mice. (b) Same as in a but WT mice (n=5, left panel) or gl3BNC60 KI (n=5, right panel) mice were immunized once with 426cTM4ΔV1-V3 gp140 dextramer in Alum Imject. (c) Same as in a but WT (n=5, left panel) or gl3BNC60 KI mice (n=5, middle panel) were immunized once with 426cTM4ΔV1-V3 gp120-dextramers in Alum Imject, or in Ribi adjuvant (n=5, right panel). (d) Same as in a but gl3BNC60 KI mice (n=5) were immunized once with 426c.TM4ΔV1-V3 gp120-C4b in Ribi adjuvant. (e) Same as in a but WT mice (n=3, left panel) or gl3BNC60 KI mice (n=5, right panel) were immunized once with 426cTM4ΔV1-V3 gp120-ferritin in Alum Imject. The red and orange lines correspond to the serum responses of the mice that were used for sorting in Figs.4, S6 and Table S3. (f) Serum IgG from WT (n=4) and gl3BNC60 KI mice (n=5) after one (p1, left two panels) or two (p2, right two panels) immunizations with WT 426c gp140-dextramer in Alum Imject were tested for binding to WT 426c gp140 (solid lines) or 426c.D368R.E370A (426c-KO, dotted lines) by ELISA. (g) gl3BNC60 (red curves), mut3BNC60 (green curves) and polyclonal HIV-IgG reagent (blue curves) were tested for binding to 426cTM4ΔV1-V3 (left panel) or 426cTM4ΔV1-V3-KO (right panel).

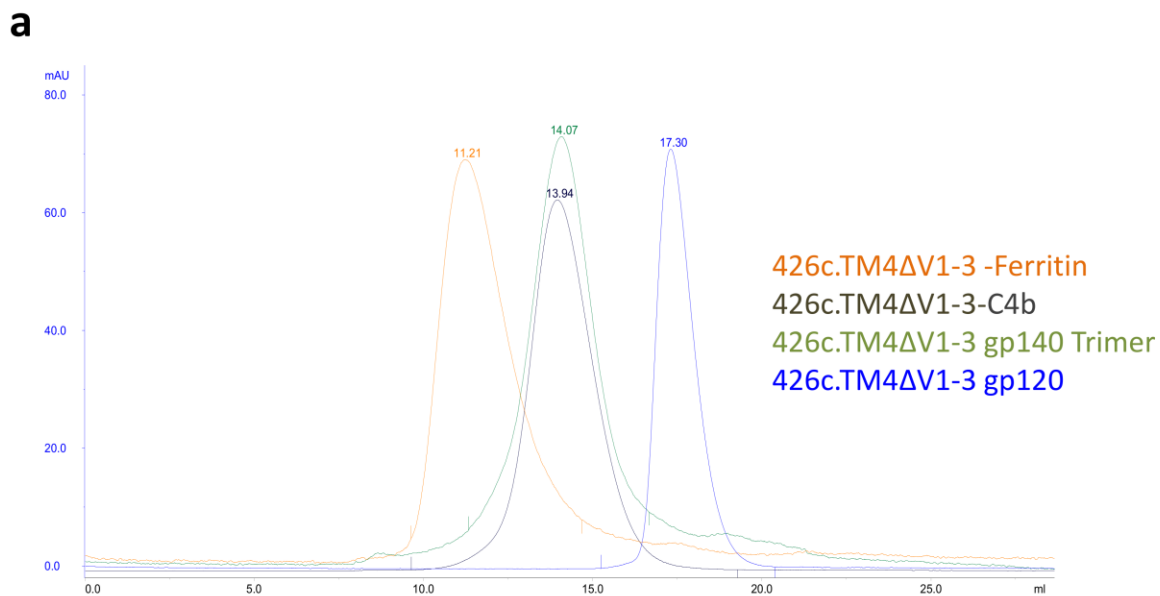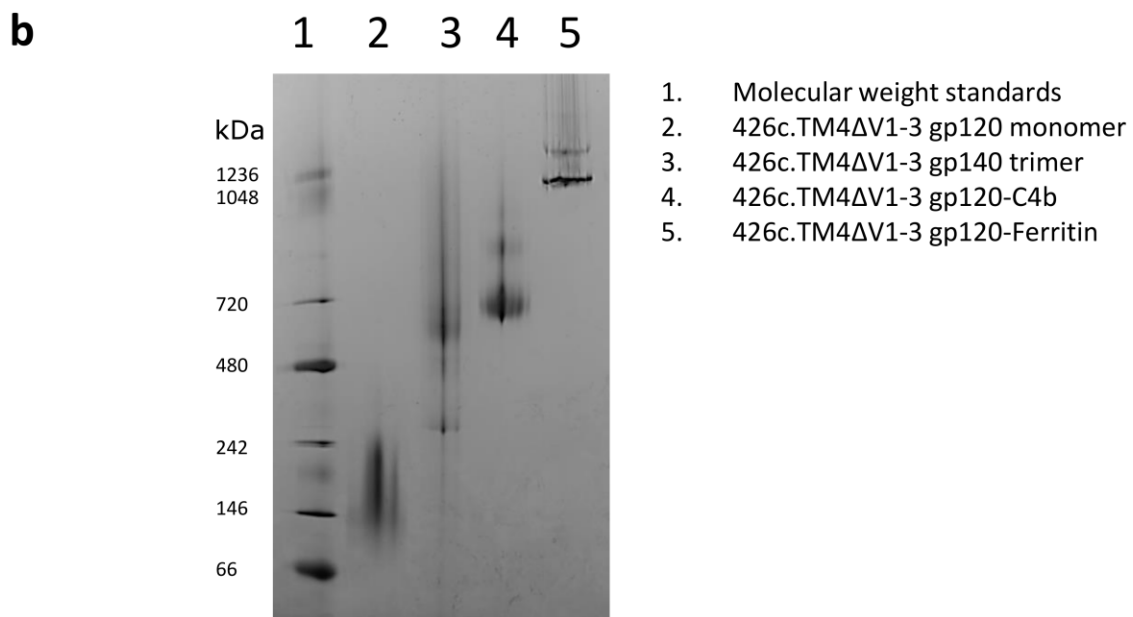

**Supplementary Figure 5. Biochemical characterization of 426cTM4ΔV1-3 multimers.**

(a) Chromatograms of the indicated multimeric 426cTM4ΔV1-3 variants run on a 10/300 Superose 6 column. The elution volume is indicated above the peak of each trace. (b) 10 μg of the indicated multimeric 426cTM4ΔV1-3 variants were subjected to BN-PAGE.

a

|   | 1 | 2  | 3  | 4  | 5 | 6 | 7  | 8  | 9 | 10 | 11 | 12 |
|---|---|----|----|----|---|---|----|----|---|----|----|----|
| A | H |    | L  | L  | L | H | H  |    | L |    |    | L  |
| B |   | HL | HL | L  | L | L |    | HL | L | L  | L  | L  |
| C | L | L  |    | L  | L | L | L  | L  | L | L  | H  | L  |
| D | L | L  |    | L  | L | L | HL | L  | L |    |    | L  |
| E | L |    | L  | L  | L | L | H  |    | L | L  | L  | L  |
| F |   | L  | L  | L  | L | L |    | L  | L | L  | L  | L  |
| G | H |    | L  | HL |   |   | L  | L  | L | L  |    | L  |
| H | X | X  | X  | X  | X |   |    | L  |   |    |    | HL |

b

Heavy Chain

|                     | CDRH1                                                                                                        | CDRH2                           | CDRH3           |
|---------------------|--------------------------------------------------------------------------------------------------------------|---------------------------------|-----------------|
| g13BNC60 (KU204946) | QVQLVQSGAEVKKPGASVKVSCKASGYTFFTGYMHWVRQAPGGLEWMGWINPNSGGTNYAQQKFKQGRVTMTRDTS----                             | ISTAYMELSRRLRSDDTAVYYCARERSDF-- | WDFDLWGRGLTVVSS |
| HC B2 (KU204947)    | .....H.....                                                                                                  | .....Q.....                     | .....           |
| HC B8 (KU204948)    | .....                                                                                                        | .....                           | .....           |
| 3BNC60 (HE584535.1) | ..H.S...A.T...R...E...KISDHFI..W...Q.V...KT.QP.NPRQ...SL..QA.WDFDTYSF..D.KAV...I.F...Q...V..S..Q...          |                                 |                 |
| VRC01 (GU980702.1)  | .....GQM...E.MRI..R...E.IDCTLN..I.L...KRP...LK.RG.AV...RPL...VY----SD..FL..RS.TV...F.T.GRNCDYN...EH...P.I... |                                 |                 |

Light Chain

|                     | CDRL1                                                                                                    | CDRL2 | CDRL3 |
|---------------------|----------------------------------------------------------------------------------------------------------|-------|-------|
| g13BNC60 (KU204949) | DIQMTQSPSSLSASVGRVTITTCQASQDISNYLNWYQQKPKGKAPKLLIYDASNLETGVPSPRFSGSGGTDFTFTISSLPEDIATYYCQQYEFIGPGTKVDIKR |       |       |
| LC F4 (KU204950)    | .....N.....                                                                                              |       |       |
| LC C6 (KU204952)    | .....F.....L.....                                                                                        |       |       |
| LC E11 (KU204953)   | .....CF.H.S.....                                                                                         |       |       |
| 3BNC60 (HE584536.1) | .....R...T.....NG...RR...G.K.R...A...RRW.QEYNL..NN...V..F..V...V..RL.L..                                 |       |       |

**Supplementary Figure 6. g13BNC60 sequences isolated from antigen-specific IgG<sup>+</sup> B cells post immunization.** IgG<sup>+</sup> B cells were sorted into single wells of a 96 well plate and VH and VK regions were amplified by PCR and Sanger sequenced. (a) Wells where a heavy, or light chain were amplified are indicated by “H” and “L”, respectively. Blank wells are indicated by an “X”. Wells shaded with a grey background contain cells sorted from the mouse with the serum response represented by the red curve in figure S4e. White wells contain cells sorted from the mouse with the serum response represented by the orange curve in figure S4e. Red letters indicate sequences where at least one amino substitution was observed. (b) Of 61 light chains that were recovered, 3 had mutations that led to amino acid substitutions (bottom). Mutated light chains, as well as the 3BNC60 light chain aligned to the g13BNC60 light chain sequence (top). Genbank accession numbers are included in parentheses.

**Supplementary Table 1. Binding kinetic values for the indicated antibodies to the indicated 426c based, trimeric gp140 constructs from Figure 2.**

| Env Name           | $K_A(M^{-1})$ | $k_{on}(M^{-1}s^{-1})$ | $k_{on} \text{ error}$ | $k_{off}(s^{-1})$ | $k_{off} \text{ error}$ |
|--------------------|---------------|------------------------|------------------------|-------------------|-------------------------|
| <b>gIVRC01</b>     |               |                        |                        |                   |                         |
| TM1                | 1.31E+06      | 1.48E+04               | 7.22E+02               | 1.13E-02          | 1.83E-04                |
| TM2                | 6.28E+05      | 3.63E+04               | 3.10E+03               | 5.79E-02          | 1.66E-03                |
| TM3                | 5.62E+05      | 3.60E+04               | 2.12E+03               | 6.40E-02          | 1.16E-03                |
| TM4                | 1.08E+06      | 2.87E+04               | 1.07E+03               | 2.64E-02          | 3.21E-04                |
| TM5                | 1.14E+07      | 2.56E+04               | 2.26E+02               | 2.25E-03          | 7.24E-06                |
| TM1ΔV1-3           | 3.09E+06      | 4.84E+03               | 3.34E+01               | 1.57E-03          | 5.29E-06                |
| TM4ΔV1-3           | 1.47E+06      | 6.25E+03               | 7.05E+01               | 4.26E-03          | 1.42E-05                |
| TM5ΔV1-3           | 1.06E+07      | 6.86E+03               | 4.74E+01               | 6.50E-04          | 4.84E-06                |
| <b>gl NIH45-46</b> |               |                        |                        |                   |                         |
| TM1                | 6.29E+05      | 9.63E+03               | 4.56E+02               | 1.53E-02          | 2.10E-04                |
| TM2                | 1.45E+05      | 1.84E+04               | 5.15E+03               | 1.27E-01          | 1.02E-02                |
| TM3                | 2.17E+05      | 2.90E+04               | 8.23E+03               | 1.34E-01          | 9.20E-03                |
| TM4                | 3.41E+05      | 1.86E+04               | 2.00E+03               | 5.46E-02          | 1.86E-03                |
| TM5                | 4.74E+06      | 1.53E+04               | 1.83E+02               | 3.23E-03          | 1.27E-05                |
| TM1ΔV1-3           | 6.82E+05      | 4.05E+03               | 4.15E+01               | 5.94E-03          | 1.41E-05                |
| TM4ΔV1-3           | 2.11E+05      | 4.78E+03               | 2.34E+02               | 2.26E-02          | 2.84E-04                |
| TM5ΔV1-3           | 4.59E+06      | 6.23E+03               | 3.81E+01               | 1.36E-03          | 4.70E-06                |
| <b>gl 12A21</b>    |               |                        |                        |                   |                         |
| TM1                | -             | -                      | -                      | -                 | -                       |
| TM2                | 2.01E+05      | 5.52E+04               | 1.15E+04               | 2.74E-01          | 2.12E-02                |
| TM3                | 1.74E+05      | 4.85E+04               | 9.76E+03               | 2.79E-01          | 1.67E-02                |
| TM4                | 3.34E+05      | 5.62E+04               | 5.35E+03               | 1.68E-01          | 5.24E-03                |
| TM5                | 3.85E+04      | 1.55E+04               | 6.15E+03               | 4.03E-01          | 2.34E-02                |
| TM1ΔV1-3           | -             | -                      | -                      | -                 | -                       |
| TM4ΔV1-3           | 3.11E+05      | 9.47E+03               | 8.13E+02               | 3.05E-02          | 6.14E-04                |
| TM5ΔV1-3           | 3.08E+04      | 1.59E+03               | 9.83E+02               | 5.15E-02          | 1.72E-03                |
| <b>gl VRC-PG19</b> |               |                        |                        |                   |                         |
| TM1                | 2.87E+05      | 4.00E+04               | 4.20E+03               | 1.40E-01          | 4.93E-03                |
| TM2                | 4.16E+05      | 7.15E+04               | 1.17E+04               | 1.72E-01          | 7.03E-03                |
| TM3                | 2.24E+06      | 9.89E+04               | 3.99E+03               | 4.42E-02          | 5.63E-04                |
| TM4                | 5.45E+06      | 9.80E+04               | 4.21E+03               | 1.80E-02          | 1.65E-04                |
| TM5                | 5.22E+06      | 8.38E+04               | 3.36E+03               | 1.60E-02          | 1.48E-04                |
| TM1ΔV1-3           | 3.53E+05      | 1.11E+04               | 3.29E+02               | 3.15E-02          | 2.48E-04                |
| TM4ΔV1-3           | 8.90E+06      | 2.41E+04               | 1.54E+02               | 2.70E-03          | 4.92E-06                |
| TM5ΔV1-3           | 8.93E+06      | 1.93E+04               | 1.09E+02               | 2.16E-03          | 4.04E-06                |



| Env Name           | $K_A(M^{-1})$ | $k_{on}(M^{-1}s^{-1})$ | $k_{on}$ error | $k_{off}(s^{-1})$ | $k_{off}$ error |
|--------------------|---------------|------------------------|----------------|-------------------|-----------------|
| <b>gIVRC-PG20</b>  |               |                        |                |                   |                 |
| TM1                | 1.40E+07      | 4.97E+04               | 9.74E+02       | 3.43E-03          | 1.39E-05        |
| TM2                | 3.88E+06      | 5.09E+04               | 1.54E+03       | 1.29E-02          | 9.98E-05        |
| TM3                | 1.20E+07      | 6.05E+04               | 1.28E+03       | 4.87E-03          | 1.92E-05        |
| TM4                | 2.28E+07      | 6.11E+04               | 1.27E+03       | 2.57E-03          | 1.11E-05        |
| TM5                | 1.78E+08      | 1.12E+05               | 1.13E+03       | 5.53E-04          | 5.05E-06        |
| TM1ΔV1-3           | 1.24E+07      | 1.35E+04               | 1.99E+02       | 1.04E-03          | 9.40E-06        |
| TM4ΔV1-3           | 3.84E+07      | 2.45E+04               | 1.11E+02       | 5.11E-04          | 3.11E-06        |
| TM5ΔV1-3           | 2.45E+08      | 4.12E+04               | 1.46E+02       | 1.49E-04          | 2.35E-06        |
| <b>gI3BNC60</b>    |               |                        |                |                   |                 |
| TM1                | -             | -                      | -              | -                 | -               |
| TM2                | -             | -                      | -              | -                 | -               |
| TM3                | -             | -                      | -              | -                 | -               |
| TM4                | -             | -                      | -              | -                 | -               |
| TM5                | -             | -                      | -              | -                 | -               |
| TM1ΔV1-3           | -             | -                      | -              | -                 | -               |
| TM4ΔV1-3           | 3.49E+03      | 1.41E+03               | 2.31E+03       | 3.98E-01          | 3.12E-02        |
| TM5ΔV1-3           | 2.18E+03      | 1.04E+03               | 3.31E+03       | 4.77E-01          | 4.79E-02        |
| <b>gI VRC-CH31</b> |               |                        |                |                   |                 |
| TM1                | -             | -                      | -              | -                 | -               |
| TM2                | -             | -                      | -              | -                 | -               |
| TM3                | -             | -                      | -              | -                 | -               |
| TM4                | -             | -                      | -              | -                 | -               |
| TM5                | -             | -                      | -              | -                 | -               |
| TM1ΔV1-3           | -             | -                      | -              | -                 | -               |
| TM4ΔV1-3           | -             | -                      | -              | -                 | -               |
| TM5ΔV1-3           | 8.95E+03      | 2.40E+03               | 4.17E+03       | 2.40E-01          | 1.65E-02        |

Values are the average of at least 2 serial Fab dilutions giving a  $R^2$  value of  $> 0.95$ . (-): no detectable binding.

**Supplementary Table 2. Summary of gl3BNC60 sequences isolated from antigen-specific IgG<sup>+</sup> B cells post immunization**

| <b>Heavy Chain Sequences</b> |                         |                         |
|------------------------------|-------------------------|-------------------------|
| <b># of sequences</b>        | <b>nt substitutions</b> | <b>AA substitutions</b> |
| 10                           | 0                       | 0                       |
| 1                            | 3                       | 1                       |
| 1                            | 1                       | 1                       |
| <b>Light Chain Sequences</b> |                         |                         |
| 57                           | 0                       | 0                       |
| 1                            | 2                       | 0                       |
| 1                            | 1                       | 1                       |
| 1                            | 3                       | 3                       |
| 1                            | 11                      | 8                       |

**Supplementary Table 3. Neutralization of HIV-1 pseudoviruses by sera from immunized mice.**

| Sample ID            | ID50 Titer in TZM.bl cells (1/x) |         |          |           |                                |          |           | 426c.TM4<br>ΔV1-3<br>immunogen |
|----------------------|----------------------------------|---------|----------|-----------|--------------------------------|----------|-----------|--------------------------------|
|                      | MuLV                             | 426C WT | 426C.TM1 | 426C.TM4  | 426C.S278A.<br>T462A.<br>T465A | T247-23* | 62357.14* |                                |
| ES15                 | <10                              | <10     | <10      | <10       | <10                            | <10      | <10       | Heptamer                       |
| HR18                 | <10                              | <10     | <10      | <10       | <10                            | <10      | <10       | Heptamer                       |
| HR19                 | <10                              | <10     | <10      | <b>24</b> | <10                            | <10      | <10       | Heptamer                       |
| ES3D                 | <10                              | <10     | <10      | <10       | <10                            | <10      | <10       | gp120-Dex                      |
| ES4D                 | <10                              | <10     | <10      | <10       | <10                            | <10      | <10       | gp120-Dex                      |
| ES5D                 | <10                              | <10     | <10      | <10       | <10                            | <10      | <10       | gp120-Dex                      |
| HS18                 | <10                              | <10     | <10      | <10       | <10                            | <10      | <10       | Ferritin                       |
| HS19                 | <10                              | <10     | <10      | <10       | <10                            | <10      | <10       | Ferritin                       |
| ES26                 | <10                              | <10     | <10      | <10       | <10                            | <10      | <10       | Ferritin                       |
| ES27                 | <10                              | <10     | <10      | <10       | <10                            | <10      | <10       | Ferritin                       |
| WT Pool              | <10                              | <10     | <10      | <b>18</b> | <10                            | <10      | <10       | Ferritin                       |
| Naïve<br>g13BNC60 KI | <10                              | <10     | <10      | <10       | <10                            | <10      | <10       | None                           |

\*Viruses naturally lack an NLGS at position 276
